# Supplementary material for: Universal screening for SARS-CoV-2 infection among pregnant women at Elmhurst Hospital Center, Queens, New York
Source: PLoS One. 2020 Dec 10;15(12):e0238409. doi: 10.1371/journal.pone.0238409 (PMC7728244; doi:10.1371/journal.pone.0238409)
Supplement: S1 Data — (XLSX) [file pone.0238409.s001.xlsx]

## Sheet: Sheet 1 - public_study_data_set
public_study_data_set
studyid	los	sars_cov_2_test_result	eth	race	lang	hhsize	maritalstatus	ghtn	pecwithout	pecwith	chtn	obesity	asthma	otherpulmonary	gdm	t1dm	t2dm	heart	kidney	thyroid	hiv	hep	depression	anxiety	pyelo	ihcp	abnormalplacentation	iugr	oligo	priorcd	smokernow	smokedbefore	delivery_mode	symptoms_on_admission	symptoms_after	count_comorbidities	insurance_type	weeks	term
M1	1	NEGATIVE	Hispanic	Other	English	3	Single	N	N	N	N	N	N	N	N	N	N	N	N	N	N	N	N	N	N	N	N	N	N	Y	No	No	vaginal birth after cesarean	No	No	0	medicaid	38	Early term
M2	2	NEGATIVE	Hispanic	Other	English	5	Married	N	N	N	Y	Y	Y	N	N	N	N	N	N	Y	N	N	Y	N	N	N	N	N	N	Y	No	No	cesarean	No	No	5	medicaid	39	Full term
M3	2	NEGATIVE	Hispanic	Other	English	1	Single	N	N	N	N	N	N	N	N	N	N	N	N	N	N	N	N	N	N	N	N	N	N	N	No	No	spontaneous vaginal	No	No	0	medicaid	39	Full term
M4	3	POSITIVE	Hispanic	Other	Spanish	5	Single	N	Y	N	N	Y	N	N	Y	N	N	N	N	N	N	N	N	N	N	N	N	N	N	N	No	No	cesarean	No	No	3	medicaid	39	Full term
M5	1	NEGATIVE	Non-Hispanic	Black	English	1	Single	N	N	N	N	-	N	N	N	N	N	N	N	N	N	N	N	N	N	N	N	N	Y	N	No	No	antepartum	No	No	0	medicaid		Extreme preterm
M6	2	NEGATIVE	Hispanic	Other	Spanish	5	Married	N	N	N	N	Y	N	N	N	N	N	N	N	N	N	N	N	N	N	N	N	N	N	N	No	No	antepartum	No	No	1	medicaid		Extreme preterm
M7	2	POSITIVE	Non-Hispanic	Asian	English	3	Married	N	N	N	N	N	N	N	Y	N	N	N	N	N	N	N	N	N	N	N	N	N	N	N	No	No	antepartum	No	No	1	medicaid		Extreme preterm
M8	2	NEGATIVE	Hispanic	Other	Spanish	1	Married	N	N	N	N	N	N	N	N	N	N	N	N	N	N	N	N	N	N	N	N	N	N	N	No	No	spontaneous vaginal	No	No	0	medicaid	40	Full term
M9	4	POSITIVE	Hispanic	Other	English	2	Married	N	N	Y	N	N	N	N	N	N	Y	N	N	N	N	N	N	N	N	N	N	Y	N	N	No	No	spontaneous vaginal	No	No	2	medicaid	37	Early term
M10	3	POSITIVE	Hispanic	Unknown	Spanish	3	Married	N	N	N	N	N	N	N	N	N	N	N	N	N	N	N	Y	N	N	Y	N	N	N	N	No	No	spontaneous vaginal	No	No	1	medicaid	37	Early term
M11	2	NEGATIVE	Hispanic	Other	Spanish	4	Married	N	N	N	Y	N	N	N	N	N	N	N	N	N	N	N	N	N	N	N	Y	N	N	Y	No	No	cesarean	No	No	1	medicaid	34	Late preterm
M12	2	NEGATIVE	Hispanic	Other	English	1	Married	N	N	N	N	N	N	N	N	N	N	N	N	N	N	N	N	N	N	N	N	N	N	N	No	No	cesarean	No	No	0	medicaid	39	Full term
M13	3	NEGATIVE	Hispanic	Other	English	1	Single	N	N	N	N	Y	Y	N	N	N	N	N	N	N	N	N	N	N	N	N	N	N	N	N	No	No	spontaneous vaginal	No	No	2	medicaid	36	Late preterm
M14	4	POSITIVE	Hispanic	Other	Spanish	3	Single	N	N	N	N	N	N	N	N	N	N	N	N	N	N	N	Y	N	N	N	N	N	N	N	No	No	antepartum	Yes	Yes	1	medicaid		Extreme preterm
M15	2	NEGATIVE	Hispanic	Other	Spanish	3	Life Partner	N	N	N	N	N	N	N	Y	N	N	N	N	N	N	N	Y	Y	N	N	N	N	N	Y	No	No	cesarean	No	No	3	medicaid	37	Early term
M16	2	NEGATIVE	Hispanic	Other	Spanish	5	Single	N	N	N	N	Y	N	N	N	N	N	N	N	N	N	N	N	N	N	N	N	N	N	N	No	No	spontaneous vaginal	No	No	1	medicaid	36	Late preterm
M17	2	NEGATIVE	Hispanic	Other	English	2	Single	N	N	N	N	N	N	N	Y	N	N	N	N	N	N	N	Y	N	N	N	N	N	N	N	No	No	spontaneous vaginal	No	No	2	medicaid	39	Full term
M18	2	POSITIVE	Hispanic	Other	Spanish	3	Married	N	N	N	N	Y	N	N	N	N	N	N	N	N	N	N	N	N	N	Y	N	N	N	N	No	No	spontaneous vaginal	No	No	1	medicaid	37	Early term
M19	3	POSITIVE	Hispanic	Other	Spanish	1	Married	N	N	Y	N	N	N	N	N	N	N	N	N	N	N	N	N	N	N	Y	N	N	N	N	No	No	spontaneous vaginal	No	No	1	medicaid	36	Late preterm
M20	2	POSITIVE	Hispanic	Other	Spanish	1	Single	N	N	N	N	N	N	N	Y	N	N	N	N	N	N	N	N	N	N	N	N	N	N	Y	No	No	cesarean	No	No	1	medicaid	37	Early term
M21	2	NEGATIVE	Hispanic	Other	English	1	Single	N	N	N	N	N	N	N	N	N	N	N	N	N	N	N	N	N	N	N	N	N	N	Y	No	No	vaginal birth after cesarean	No	No	0	medicaid	39	Full term
M22	2	POSITIVE	Hispanic	Other	Spanish	7	Single	N	N	N	N	N	N	N	N	N	N	N	N	N	N	N	N	N	N	N	N	N	N	N	No	No	spontaneous vaginal	No	No	0	medicaid	40	Full term
M23	2	NEGATIVE	Non-Hispanic	Asian	English	1	Married	N	N	N	N	Y	N	N	Y	N	N	N	N	N	N	N	N	N	N	N	N	N	N	Y	No	No	vaginal birth after cesarean	No	No	2	medicaid	39	Full term
M24	5	POSITIVE	Hispanic	Other	Spanish	1	Married	N	N	N	N	Y	N	N	N	N	N	N	N	N	N	N	N	N	N	Y	N	N	Y	N	No	No	spontaneous vaginal	Yes	Same as admission	1	medicaid	36	Late preterm
M25	2	POSITIVE	Hispanic	Other	Spanish	6	Married	N	N	N	N	N	N	N	N	N	N	N	N	N	N	N	N	N	N	N	N	N	N	N	No	No	spontaneous vaginal	No	No	0	medicaid	39	Full term
M26	3	NEGATIVE	Non-Hispanic	Other	English	1	Single	N	N	N	N	Y	N	N	N	N	N	N	N	N	N	N	N	N	N	N	N	N	N	N	No	No	cesarean	No	No	1	medicaid	41	Late and post term
M27	2	NEGATIVE	Hispanic	Other	Spanish	1	Single	N	N	N	N	N	N	N	N	N	N	N	N	N	N	N	N	N	N	Y	N	N	N	N	No	No	spontaneous vaginal	No	No	0	medicaid	37	Early term
M28	2	POSITIVE	Non-Hispanic	Asian	English	1	Single	N	N	N	N	N	N	N	Y	N	N	N	N	N	N	N	N	N	N	N	N	N	N	N	No	No	spontaneous vaginal	No	Yes	1	private	39	Full term
M29	3	NEGATIVE	Hispanic	American Indian	Spanish	1	Single	N	N	N	N	Y	N	N	N	N	N	N	N	N	N	N	N	N	N	Y	N	N	N	N	No	No	spontaneous vaginal	No	No	1	medicaid	37	Early term
M30	3	POSITIVE	Hispanic	Other	Spanish	4	Married	N	N	Y	N	Y	N	N	N	N	N	N	N	N	N	N	N	N	N	N	N	N	N	N	No	No	spontaneous vaginal	No	No	2	medicaid	36	Late preterm
M31	3	NEGATIVE	Hispanic	Other	Spanish	1	Married	N	N	N	N	N	N	N	N	N	N	N	N	N	N	N	N	N	N	N	N	N	N	N	No	No	cesarean	No	No	0	medicaid	39	Full term
M32	2	NEGATIVE	Non-Hispanic	Asian	English	1	Married	N	N	N	N	N	N	N	N	N	N	N	N	N	N	N	N	N	N	N	N	N	N	Y	No	No	cesarean	No	No	0	medicaid	37	Early term
M33	2	NEGATIVE	Hispanic	Other	Spanish	6	Married	N	N	N	N	N	N	N	N	N	N	N	N	N	N	N	N	N	N	N	N	N	N	N	No	No	spontaneous vaginal	No	No	0	medicaid	19	Extreme preterm
M34	2	NEGATIVE	Hispanic	Other	Spanish	4	Single	N	N	N	N	N	N	N	Y	N	N	N	N	N	N	N	Y	N	N	N	N	N	N	Y	No	Yes	cesarean	No	No	2	medicaid	39	Full term
M35	3	POSITIVE	Hispanic	Other	Spanish	3	Single	N	N	N	N	N	N	N	N	N	N	N	N	N	N	N	N	N	N	N	N	N	N	N	No	No	spontaneous vaginal	No	No	0	medicaid	37	Early term
M36	2	POSITIVE	Hispanic	Other	Spanish	1	Married	N	N	N	N	Y	N	N	N	N	N	N	N	N	N	N	N	N	N	N	N	N	N	N	No	No	antepartum	Yes	Same as admission	1	medicaid		Extreme preterm
M37	2	POSITIVE	Hispanic	Other	Spanish	3	Single	N	N	N	Y	Y	N	N	N	N	N	N	N	N	N	N	Y	N	N	N	N	N	N	N	No	No	antepartum	No	No	3	medicaid		Extreme preterm
M38	2	NEGATIVE	Non-Hispanic	Asian	English	4	Married	N	N	Y	N	N	N	N	N	N	N	N	N	Y	N	N	N	N	N	N	N	N	N	N	No	No	spontaneous vaginal	No	No	2	medicaid	35	Late preterm
M39	2	NEGATIVE	Hispanic	Black	Spanish	1	Life Partner	N	N	N	N	N	N	N	N	N	N	N	N	N	N	N	N	N	N	N	N	N	N	N	No	No	spontaneous vaginal	No	No	0	medicaid	39	Full term
M40	1	POSITIVE	Hispanic	Other	Spanish	1	Life Partner	N	N	N	N	N	N	N	N	N	N	N	N	N	N	N	N	N	N	N	N	Y	N	N	No	No	spontaneous vaginal	Yes	Yes	0	medicaid	38	Early term
M41	2	POSITIVE	Hispanic	Other	Spanish	1	Married	N	N	N	N	N	N	N	N	N	N	N	N	Y	N	N	Y	N	N	N	N	N	N	N	No	No	spontaneous vaginal	No	No	2	medicaid	37	Early term
M42	2	NEGATIVE	Hispanic	Other	Spanish	1	Divorced	N	N	N	N	N	N	N	N	N	N	N	N	N	N	N	N	N	N	N	N	Y	N	N	No	No	spontaneous vaginal	No	No	0	medicaid	39	Full term
M43	6	POSITIVE	Hispanic	Other	Spanish	4	Life Partner	N	N	N	N	N	N	N	N	N	N	N	N	N	N	N	N	N	N	N	N	N	N	Y	No	No	cesarean	Yes	Yes	0	medicaid	37	Early term
M44	2	NEGATIVE	Hispanic	Other	Spanish	1	Single	N	N	N	N	Y	N	N	Y	N	N	N	N	N	N	N	N	N	N	Y	N	N	N	N	No	No	spontaneous vaginal	No	No	2	medicaid	37	Early term
M45	3	NEGATIVE	Non-Hispanic	White	English	1	Married	N	Y	N	N	Y	N	N	N	N	N	N	N	N	N	N	N	N	N	N	Y	Y	Y	N	No	Yes	antepartum	No	No	2	medicaid		Extreme preterm
M46	3	NEGATIVE	Hispanic	Other	Spanish	4	Single	N	N	N	N	N	N	N	N	N	N	N	N	N	N	N	N	N	N	N	Y	N	N	Y	No	No	antepartum	No	No	0	medicaid		Extreme preterm
M47	2	NEGATIVE	Non-Hispanic	Asian	English	1	Married	N	N	N	N	N	N	N	N	N	N	N	N	N	N	N	N	N	N	N	N	Y	N	Y	No	No	cesarean	No	No	0	medicaid	38	Early term
M48	2	NEGATIVE	Non-Hispanic	Asian	English	1	Single	N	N	N	N	Y	N	N	Y	N	N	N	N	N	N	N	N	N	N	N	N	N	N	Y	No	No	cesarean	No	No	2	private	40	Full term
M49	4	NEGATIVE	Non-Hispanic	Asian	English	1	Married	N	N	N	N	N	N	N	N	N	N	N	N	N	N	N	N	N	N	N	N	N	N	N	No	No	cesarean	No	No	0	uninsured	41	Late and post term
M50	3	POSITIVE	Non-Hispanic	Asian	English	1	Single	N	N	N	N	N	N	N	N	N	N	N	N	N	N	N	N	N	N	N	N	N	N	N	No	No	spontaneous vaginal	No	No	0	medicaid	41	Late and post term
M51	2	POSITIVE	Hispanic	Other	Spanish	3	Divorced	N	N	N	N	Y	Y	N	N	N	N	N	N	N	N	N	Y	N	N	N	N	N	N	N	No	No	spontaneous vaginal	No	No	3	medicaid	39	Full term
M52	1	NEGATIVE	Non-Hispanic	Asian	English	5	Married	N	N	N	N	N	N	N	Y	N	N	N	N	N	N	N	N	N	N	N	N	N	N	N	No	No	spontaneous vaginal	No	No	1	private	36	Late preterm
M53	2	NEGATIVE	Hispanic	Other	Spanish	2	Single	N	N	N	N	N	N	N	N	N	N	N	N	N	N	N	N	Y	N	N	N	N	N	N	No	No	spontaneous vaginal	No	No	1	medicaid	39	Full term
M54	1	NEGATIVE	Hispanic	Other	Spanish	1	Married	N	N	N	N	N	N	N	N	N	N	N	N	N	N	N	N	N	N	N	N	N	N	N	No	No	spontaneous vaginal	No	No	0	medicaid	38	Early term
M55	2	NEGATIVE	Hispanic	Other	Spanish	3	Single	N	N	N	N	Y	N	N	N	N	N	N	N	N	N	N	N	N	N	N	N	N	N	N	No	No	spontaneous vaginal	No	No	1	medicaid	39	Full term
M56	3	NEGATIVE	Hispanic	Other	Spanish	1	Married	N	N	N	N	N	N	N	N	N	N	N	N	N	N	N	N	N	N	N	N	N	N	N	No	No	cesarean	No	No	0	medicaid	38	Early term
M57	2	NEGATIVE	Hispanic	Other	English	5	Single	N	N	N	N	Y	N	N	N	N	N	N	N	Y	N	N	N	N	N	N	N	N	N	N	No	No	spontaneous vaginal	No	No	2	medicaid	38	Early term
M58	2	NEGATIVE	Non-Hispanic	Asian	English	1	Single	N	N	N	N	N	N	N	N	N	N	N	N	N	N	N	N	N	N	N	N	N	N	N	No	No	spontaneous vaginal	No	No	0	medicaid	40	Full term
M59	2	NEGATIVE	Hispanic	Other	Spanish	1	Single	N	N	N	N	N	N	N	N	N	N	N	N	N	N	N	N	N	N	N	N	N	N	N	No	No	cesarean	No	No	0	medicaid	38	Early term
M60	2	POSITIVE	Hispanic	Other	Spanish	1	Divorced	Y	N	N	N	N	N	N	N	N	N	N	N	N	N	N	N	N	N	N	N	N	N	N	No	No	spontaneous vaginal	No	No	1	medicaid	39	Full term
M61	4	POSITIVE	Hispanic	Other	English	3	Separated	N	N	N	N	N	N	N	N	N	N	N	N	N	N	N	Y- history of	N	N	N	N	N	N	N	No	Yes	antepartum	Yes	Yes	0	medicaid		Extreme preterm
M62	2	NEGATIVE	Non-Hispanic	Black	French	1	Married	N	N	N	N	Y	N	N	N	N	N	N	N	N	N	N	N	N	N	N	N	N	Y	Y	No	No	cesarean	No	No	1	medicaid	39	Full term
M63	2	POSITIVE	Hispanic	Other	Spanish	2	Single	N	N	N	N	Y	N	N	N	N	N	N	N	N	N	N	N	N	N	N	N	N	N	N	No	No	spontaneous vaginal	No	No	1	private	40	Full term
M64	2	NEGATIVE	Hispanic	Other	English	4	Married	N	N	N	N	Y	N	N	N	N	N	N	N	N	N	N	N	N	N	N	N	N	N	N	No	No	spontaneous vaginal	No	No	1	uninsured	37	Early term
M65	2	POSITIVE	Hispanic	Other	Spanish	1	Married	N	N	N	N	Y	N	N	N	N	N	N	N	N	N	N	N	N	N	N	N	N	N	Y	No	No	cesarean	No	No	1	medicaid	39	Full term
M66	13	POSITIVE	Non-Hispanic	White	English	3	Single	N	N	N	N	N	N	N	N	Y	N	N	N	N	N	N	N	N	N	N	N	N	N	Y	No	No	antepartum	No	No	1	medicaid		Extreme preterm
M67	2	POSITIVE	Hispanic	Other	Spanish	3	Married	N	N	N	N	N	N	N	N	N	N	N	N	Y	N	N	N	N	N	N	N	N	N	N	No	No	spontaneous vaginal	Yes	same as admission	1	private	39	Full term
M68	2	POSITIVE	Hispanic	Other	English	2	Single	N	N	N	N	N	Y	N	N	N	N	N	N	N	Y	N	Y	Y	N	N	N	N	N	N	Yes	Yes	cesarean	No	No	4	medicaid	38	Early term
M69	3	POSITIVE	Hispanic	Other	Spanish	2	Married	N	N	N	N	N	N	N	N	N	N	N	N	N	N	N	N	N	Y	N	N	N	N	N	No	No	spontaneous vaginal	No	No	0	medicaid	41	Late and post term
M70	1	NEGATIVE	Non-Hispanic	Other	Bengali	1	Married	N	N	N	N	Y	N	N	N	N	N	N	N	N	N	N	N	N	N	N	N	N	N	N	No	No	spontaneous vaginal	No	No	1	medicaid	40	Full term
M71	2	NEGATIVE	Hispanic	Unknown	Spanish	2	Single	N	N	N	N	N	N	N	N	N	N	N	N	N	N	N	N	N	N	N	N	N	N	N	No	No	spontaneous vaginal	No	No	0	medicaid	38	Early term
M72	2	NEGATIVE	Hispanic	Other	English	3	Single	N	N	N	N	N	Y	N	N	N	N	N	N	N	N	N	N	N	N	N	N	N	N	Y	No	No	vaginal birth after cesarean	No	No	1	uninsured	40	Full term
M73	2	POSITIVE	Hispanic	Other	Spanish	1	Life Partner	N	N	N	N	N	N	N	N	N	N	N	N	N	N	N	N	N	N	N	N	N	N	N	No	No	spontaneous vaginal	No	No	0	medicaid	41	Late and post term
M74	4	POSITIVE	Non-Hispanic	Black	English	1	Married	N	N	N	N	N	N	N	N	N	N	N	N	N	N	N	N	N	N	N	N	N	N	Y	No	No	cesarean	No	YES	0	medicaid	39	Full term
M75	2	NEGATIVE	Non-Hispanic	Asian	English	1	Life Partner	N	N	N	N	N	N	N	N	N	N	N	N	N	N	N	N	N	N	N	N	N	N	N	No	No	spontaneous vaginal	No	No	0	medicaid	39	Full term
M76	2	NEGATIVE	Non-Hispanic	Asian	English	2	Married	N	N	Y	N	N	N	N	N	N	N	N	N	N	N	N	N	N	N	N	N	N	N	N	No	No	spontaneous vaginal	No	No	1	medicaid	40	Full term
M77	3	NEGATIVE	Non-Hispanic	Asian	Hindi	1	Married	Y	N	N	N	N	N	N	Y	N	N	N	N	N	N	N	N	N	N	Y	N	N	N	N	No	No	cesarean	No	No	2	medicaid	38	Early term
M78	2	NEGATIVE	Non-Hispanic	White	English	1	Married	N	N	N	N	N	N	N	N	N	N	N	N	N	N	N	N	N	N	N	N	N	N	N	No	No	spontaneous vaginal	No	No	0	medicaid	40	Full term
M79	3	NEGATIVE	Hispanic	Other	Spanish	1	Life Partner	N	Y	N	N	N	N	N	N	N	N	N	N	N	N	N	N	N	N	N	N	N	N	N	No	No	spontaneous vaginal	No	No	1	medicaid	41	Late and post term
M80	2	NEGATIVE	Hispanic	Other	Spanish	1	Single	N	N	N	N	N	N	N	N	N	N	N	N	N	N	N	N	N	N	N	N	N	N	N	No	No	cesarean	No	No	0	medicaid	41	Late and post term
M81	3	NEGATIVE	Non-Hispanic	Asian	English	1	Single	N	N	N	N	N	N	N	N	N	N	N	N	N	N	N	N	N	N	N	N	N	N	N	No	No	spontaneous vaginal	No	No	0	medicaid	40	Full term
M82	2	POSITIVE	Non-Hispanic	Asian	English	1	Married	N	N	N	N	N	N	N	Y	N	N	N	N	N	N	N	N	N	N	N	N	N	N	Y	No	No	cesarean	YES	Same as admission - cough only	1	medicaid	39	Full term
M83	3	NEGATIVE	Non-Hispanic	Asian	Bengali	3	Married	N	N	N	N	N	N	N	N	N	N	N	N	Y	N	N	N	N	N	N	N	Y	N	Y	No	No	cesarean	No	No	1	medicaid	38	Early term
M84	2	POSITIVE	Non-Hispanic	White	English	2	Single	Y	N	N	N	N	N	N	N	N	N	N	N	N	N	N	N	N	N	N	N	N	N	N	No	No	spontaneous vaginal	No	No	1	medicaid	40	Full term
M85	3	POSITIVE	Hispanic	White	Spanish	1	Single	N	N	N	N	N	N	N	N	N	N	N	N	N	N	N	N	N	N	N	N	N	N	N	No	No	cesarean	No	No	0	medicaid	38	Early term
M87	3	NEGATIVE	Non-Hispanic	Asian	English	1	Single	N	N	N	N	N	N	N	N	N	N	N	N	N	N	N	N	N	N	N	N	N	N	N	No	No	spontaneous vaginal	No	No	0	medicaid	41	Late and post term
M88	2	INVALID	Hispanic	Other	Spanish		Single	N	N	N	N	N	N	N	N	N	N	N	N	N	N	N	N	N	N	N	N	Y	N	N	No	No	spontaneous vaginal	No	No	0	medicaid	38	Early term
M89	3	INVALID	Hispanic	Other	Spanish	1	Life Partner	N	N	N	N	N	N	N	N	N	N	N	N	N	N	N	N	N	N	N	N	Y	N	N	No	No	cesarean	No	No	0	medicaid	38	Early term
M90	2	POSITIVE	Hispanic	White	Spanish	4	Married	N	N	N	N	Y	N	N	N	N	N	N	N	N	N	N	N	N	N	N	N	N	N	N	No	No	cesarean	No	No	1	medicaid	39	Full term
M91	2	NEGATIVE	Non-Hispanic	Other	Arabic	1	Married	N	N	N	N	N	N	N	N	N	N	N	N	N	N	N	N	N	N	N	N	N	N	N	No	No	cesarean	No	No	0	medicaid	39	Full term
M92	3	POSITIVE	Hispanic	Other	Spanish	4	Married	N	N	N	N	N	N	N	N	N	N	N	N	N	N	N	N	N	N	N	N	N	N	N	No	No	cesarean	No	No	0	medicaid	41	Late and post term
M93	3	NEGATIVE	Non-Hispanic	Asian	Bengali	1	Married	N	N	N	N	N	N	N	N	N	N	N	N	N	N	N	N	N	N	N	N	N	N	N	No	No	spontaneous vaginal	No	No	0	medicaid	37	Early term
M94	2	NEGATIVE	Non-Hispanic	Asian	Nepali	1	Married	N	N	N	N	N	N	N	N	N	N	N	N	N	N	N	N	N	N	N	N	N	N	N	No	No	spontaneous vaginal	No	No	0	private	40	Full term
M95	1	POSITIVE	Hispanic	Unknown	Spanish		Single	N	N	N	N	N	N	N	N	N	N	N	N	N	N	N	N	N	N	N	N	N	N	N	No	No	spontaneous vaginal	No	No	0	medicaid	37	Early term
M96	1	NEGATIVE	Non-Hispanic	Black	French	1	Married	N	N	N	N	N	N	N	N	N	N	N	N	N	N	N	N	N	N	N	N	N	N	N	No	No	spontaneous vaginal	No	No	0	medicaid	38	Early term
M97	3	NEGATIVE	Hispanic	Other	Spanish	6	Married	N	N	N	N	N	N	N	N	N	N	N	N	N	N	N	N	N	N	N	N	N	N	N	No	No	cesarean	No	No	0	medicaid	40	Full term
M98	2	NEGATIVE	Hispanic	Other	Spanish		Single	N	N	N	N	N	N	N	N	N	N	N	N	N	N	N	N	N	N	N	N	N	N	N	No	No	vag assisted	No	No	0	medicaid	40	Full term
M99	2	NEGATIVE	Hispanic	Other	Spanish	3	Single	N	N	N	N	N	N	N	N	N	N	N	N	N	N	N	N	N	N	N	N	N	N	N	No	No	spontaneous vaginal	No	No	0	medicaid	38	Early term
M100	2	POSITIVE	Hispanic	Other	Spanish	1	Single	N	N	N	N	N	N	N	N	N	N	N	N	N	N	N	N	N	N	N	N	N	N	N	No	No	spontaneous vaginal	No	No	0	medicaid	40	Full term
M101	4	NEGATIVE	Non-hispanic	Asian	English	1	Single	N	N	N	N	N	N	N	N	N	N	N	N	N	N	N	N	N	N	N	N	N	N	N	No	No	spontaneous vaginal	No	No	0	medicaid	41	Late and post term
M102	2	NEGATIVE	Non-Hispanic	Asian	Bengali	1	Married	N	N	N	N	-	N	N	N	N	N	N	N	N	N	N	N	N	N	N	N	N	N	N	No	No	cesarean	No	No	0	private	39	Full term
M103	3	NEGATIVE	Non-Hispanic	Black	English	6	Married	N	N	N	N	Y	N	N	N	N	N	N	N	N	N	N	N	N	N	N	N	N	N	N	Yes	Yes	spontaneous vaginal	No	No	1	medicaid	40	Full term
M104	3	NEGATIVE	Hispanic	Other	Spanish	1	Single	N	N	N	N	N	N	N	N	N	N	N	N	N	N	N	N	N	N	N	N	N	N	N	No	No	cesarean	No	No	0	medicaid	39	Full term
M105	1	NEGATIVE	Non-Hispanic	Pacific Islander	English		Single	N	N	N	N	N	N	N	N	N	N	N	N	N	N	N	N	N	N	N	N	N	N	N	Yes	Yes	spontaneous vaginal	No	No	0	medicaid	40	Full term
M106	4	NEGATIVE	Non-hispanic	Asian	English	1	Married	N	N	N	N	Y	N	N	N	N	N	N	N	N	N	N	N	N	N	N	N	N	N	N	No	No	cesarean	No	No	1	medicaid	40	Full term
M107	4	NEGATIVE	Hispanic	Other	Spanish	2	Single	N	N	N	N	N	N	N	N	N	N	N	N	N	N	N	N	N	N	N	N	N	N	N	No	No	cesarean	No	No	0	medicaid	39	Full term
M108	3	POSITIVE	Hispanic	Other	Spanish	2	Single	N	N	N	N	-	N	N	N	N	N	N	N	N	N	N	N	N	N	N	N	N	N	N	No	No	spontaneous vaginal	No	No	0	medicaid	37	Early term
M109	2	NEGATIVE	Hispanic	White	Spanish		Married	N	N	N	N	N	N	N	N	N	N	N	N	N	N	N	N	N	N	N	N	N	N	N	No	No	spontaneous vaginal	No	No	0	medicaid	39	Full term
M110	7	POSITIVE	Hispanic	Other	Spanish		Single	N	N	N	N	N	N	N	N	N	N	N	N	N	N	N	N	N	N	N	N	N	N	Y	No	No	antepartum	Yes	Yes	0	medicaid	AP	Extreme preterm
M111	7	POSITIVE	Non-hispanic	Asian	Bengali		Married	N	N	N	N	N	N	N	N	N	N	N	N	N	N	N	N	N	N	N	N	N	N	Y	No	No	vaginal birth after cesarean	Yes	Yes	0	medicaid	40	Full term
M112	2	NEGATIVE	Non-hispanic	Asian	English		Married	N	N	N	N	N	N	N	N	N	N	N	N	N	N	N	N	N	N	N	N	N	N	N	No	No	spontaneous vaginal	No	No	0	medicaid	40	Full term
M113	2	NEGATIVE	Hispanic	White	Spanish		Single	N	N	N	N	N	N	N	N	N	N	N	N	N	N	N	N	N	N	N	N	Y	N	Y	No	No	vaginal birth after cesarean	No	No	0	medicaid	39	Full term
M114	2	NEGATIVE	Non-hispanic	Other	Arabic		Married	N	N	N	N	Y	N	N	N	N	N	N	N	N	N	N	N	N	N	N	N	N	N	Y	No	No	cesarean	Yes	No	1	private	39	Full term
M115	2	NEGATIVE	Non-hispanic	Other	English		Single	N	N	N	N	N	N	N	N	N	N	N	N	N	N	N	N	N	N	N	N	N	N	N	No	No	spontaneous vaginal	No	No	0	medicaid	36	Late preterm
M116	2	NEGATIVE	Hispanic	Other	Spanish		Single	N	N	N	N	Y	N	N	N	N	N	N	N	N	N	N	N	N	N	N	N	N	N	Y	No	No	vaginal birth after cesarean	No	Yes	1	medicaid	21	Extreme preterm
M117	2	NEGATIVE	Non-hispanic	Other	Albanian		Single	Y	N	N	N	N	N	N	N	N	N	N	N	N	N	N	N	N	N	N	N	N	N	N	No	No	spontaneous vaginal	No	No	1	medicaid	39	Full term
M118	2	NEGATIVE	Hispanic	White	Spanish		Married	N	N	N	N	Y	N	N	N	N	N	N	N	N	N	N	N	N	N	N	N	N	N	N	No	No	spontaneous vaginal	No	No	1	medicaid	39	Full term
M119	6	POSITIVE	Hispanic	Other	Spanish	1	Single	N	N	N	N	-	N	N	N	N	N	N	N	N	N	N	N	N	N	N	N	N	N	N	Unk	Unk	antepartum	Yes	same as admission	0	medicaid		Extreme preterm
M120	2	POSITIVE	Non-hispanic	Unknown	English		Married	N	N	N	N		N	N	N	N	N	N	N	Y	N	N	N	N	N	N	N	N	N	N	Unknwn	Unknwn	cesarean	No	No	1	medicaid	39	Full term
M121	2	NEGATIVE	Non-Hispanic	Black	English	2	Single	N	N	N	N	-	Y	N	N	N	N	N	N	N	N	N	Y	Y	N	N	N	N	N	N	No	No	spontaneous vaginal	No	No	3	medicaid	39	Full term
M122	1	NEGATIVE	Non-Hispanic	Other	Arabic	5	Married	N	N	N	N	-	N	N	Y	N	N	N	N	N	N	N	N	N	N	N	N	N	N	Y	No	No	cesarean	No	No	1	medicaid	34	Late preterm
M123	2	NEGATIVE	Hispanic	Other	Spanish	5	Single	N	N	N	N	-	N	N	N	N	N	N	N	N	N	N	N	N	N	N	N	N	N	N	No	No	spontaneous vaginal	No	No	0	uninsured	38	Early term
M124	2	NEGATIVE	Non-hispanic	Asian	English	1	Single	N	N	N	N	N	N	N	N	N	N	N	N	N	N	N	N	N	N	N	N	Y	N	N	No	Yes	spontaneous vaginal	No	No	0	medicaid	39	Full term
M125	2	POSITIVE	Non-hispanic	Other	Spanish	1	Single	N	N	N	N	N	N	N	N	N	N	N	N	N	N	N	N	N	N	Y	N	N	N	Y	No	No	cesarean	No	No	0	medicaid	37	Early term
M126	3	POSITIVE	Hispanic	Other	Spanish	1	Life Partner	N	N	N	N	Y	N	N	N	N	N	N	N	N	N	N	N	N	N	N	N	N	N	N	No	No	spontaneous vaginal	Yes	same as admission	1	medicaid	39	Full term
M127	2	POSITIVE	Hispanic	Other	Spanish	3	Life Partner	N	N	N	N	Unknwn	N	N	N	N	N	N	N	N	N	N	N	N	N	N	N	N	N	N	Unknwn	Unknwn	cesarean	Yes	same as admission	0	medicaid	39	Full term
